# Supplementary material
Source: Springer Nature journal article supplement (https://www.springermedizin.de/resource/supplementary/12889_2008_1270_MOESM2_ESM.pdf/9502832)

# Health information sources

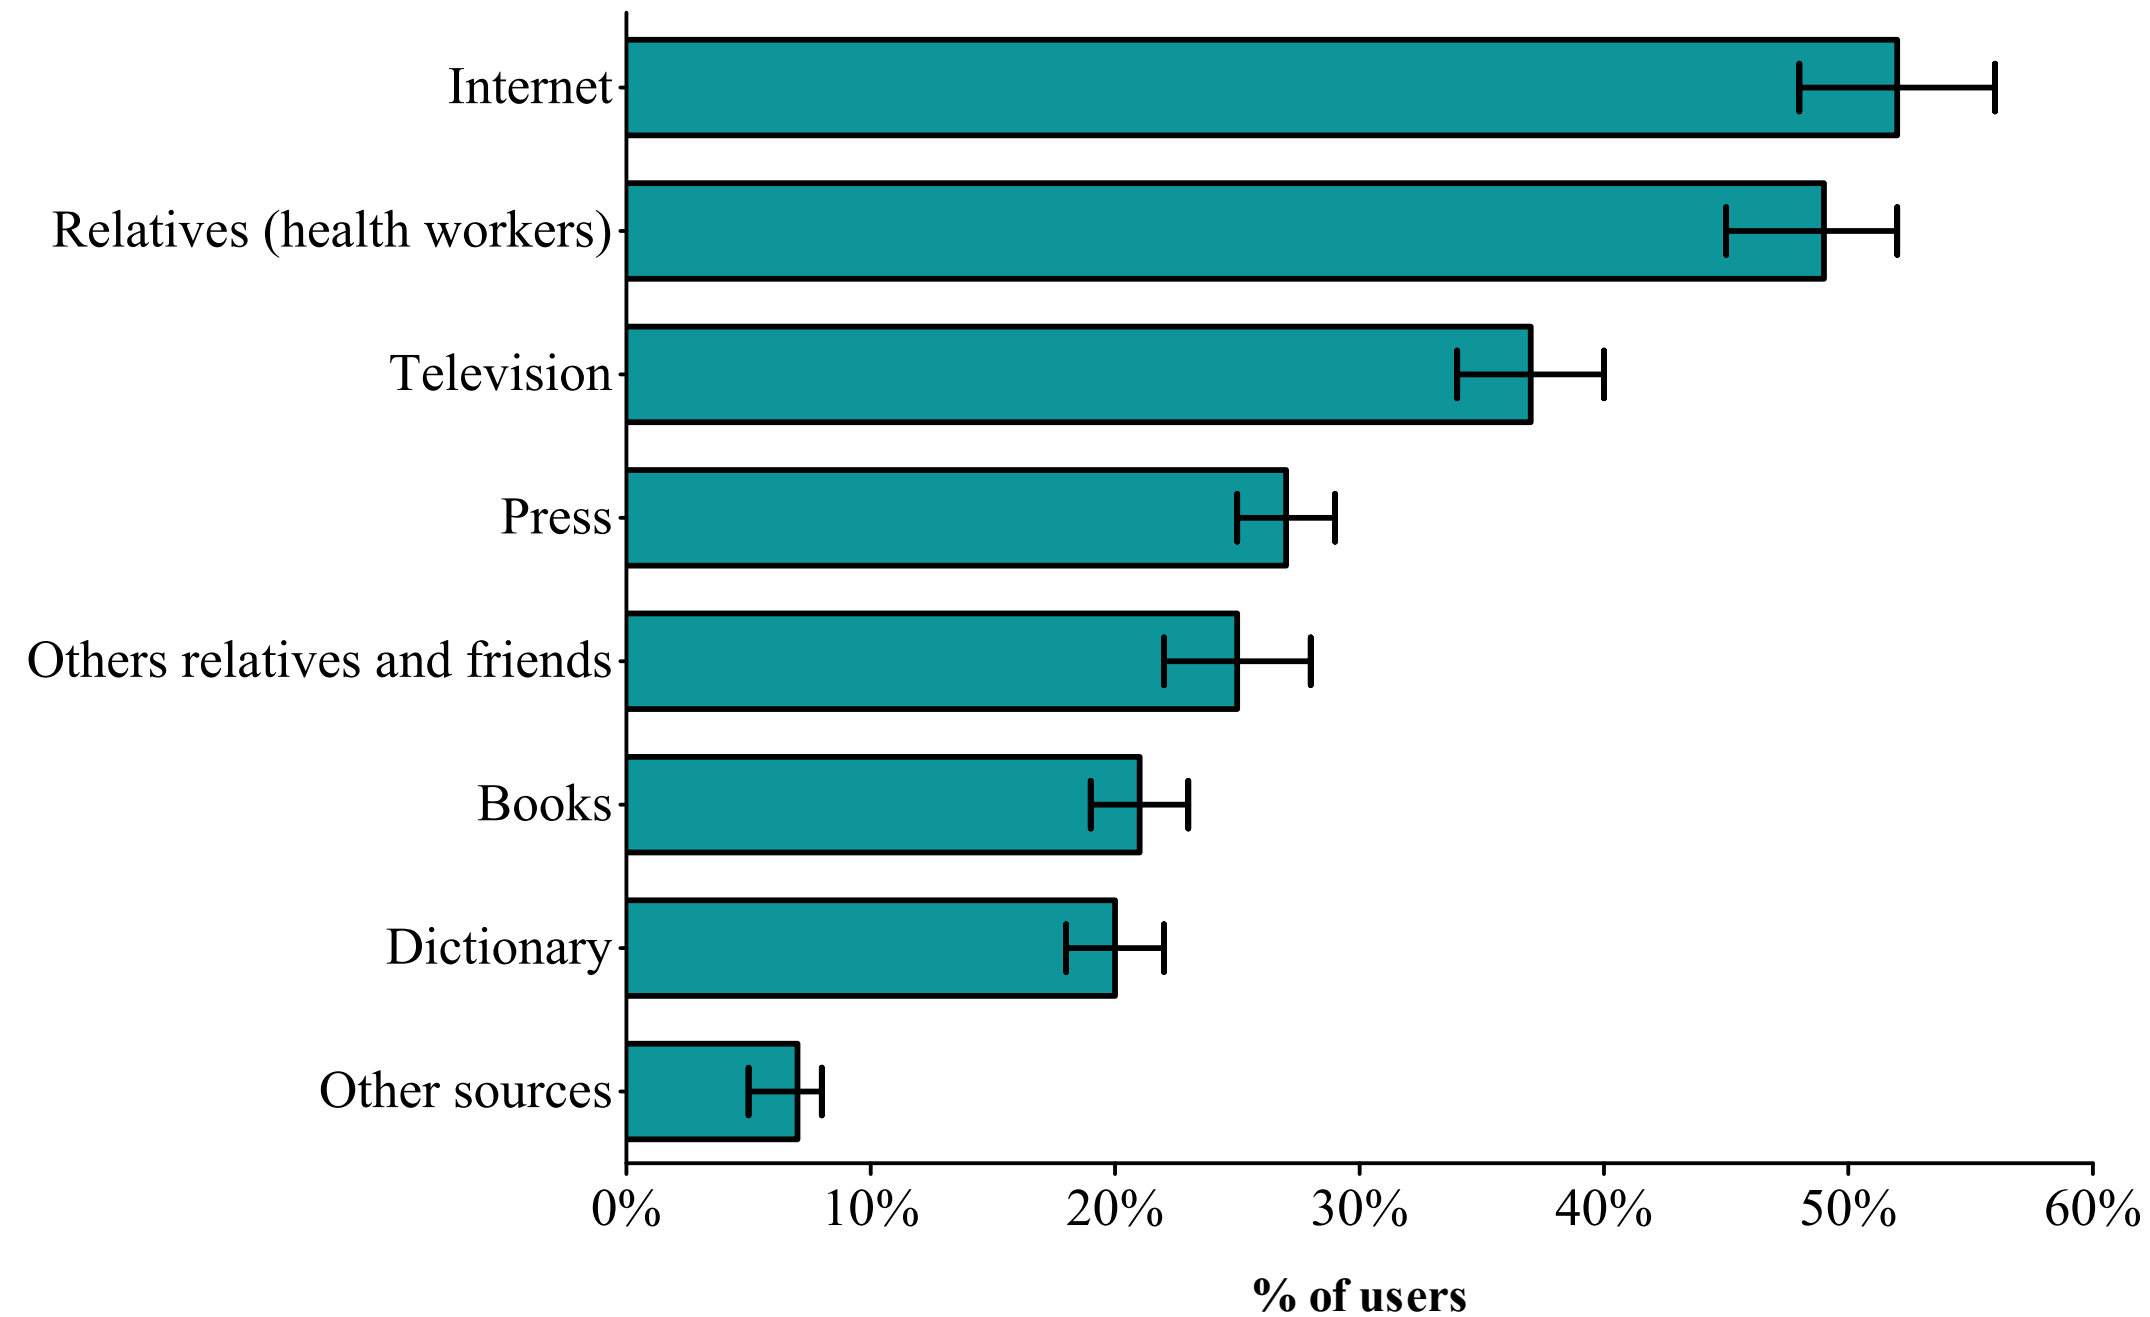

Supplement: MOESM2 [file 9502832]
